# Supplementary material
Source: PubMed Central journal article supplement (PMC4337229)
Supplement: NIHMS663659-supplement-1.pdf [file NIHMS663659-supplement-1.pdf]

Supporting Information for:

## The Mechanisms of RNA SHAPE Chemistry

Jennifer L. McGinnis, Jack A. Dunkle, Jamie H. D. Cate, Kevin M. Weeks\*

\* correspondence: weeks@unc.edu

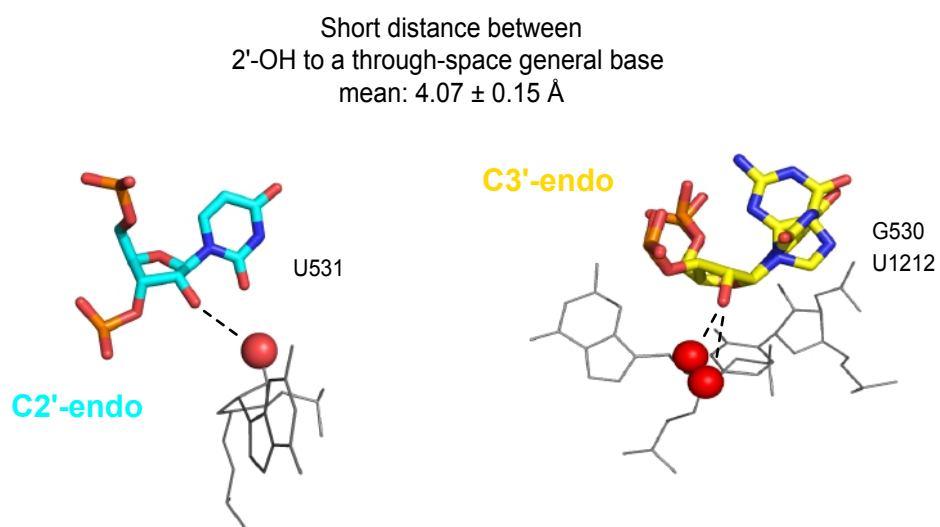

**Supporting Figure 1:** Nucleotides in which the 2'-OH group is close to a through-space group capable of hydrogen bond formation and general base catalysis. Nucleotides in the C2'- or C3'-endo ribose conformations are illustrated in cyan and yellow, respectively. Through-space neighbors are shown in gray with the hydrogen-bonding functional group illustrated with a red sphere.

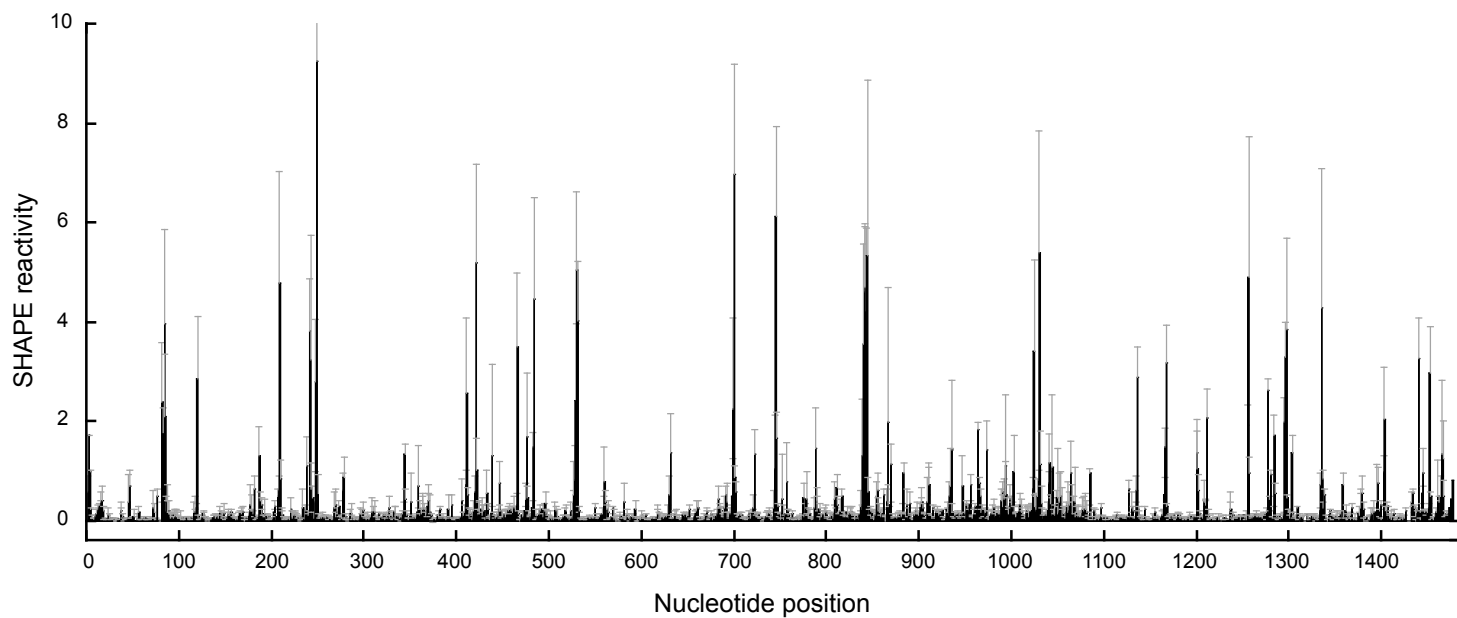

**Supporting Figure 2:** SHAPE reactivity histogram reporting the mean of three independent experiments. Standard deviations at each nucleotide are indicated with gray error bars. These data have been deposited in the SNRNASM database.

**Table S1: Conformations of nucleotides with high SHAPE reactivities (0.7 – 2.0), B-factor less than 60, and well-defined position in the ribosome crystal.**

| Position | Facilitating interaction(s)                             | Conforms to model | Non-adjacent interaction |
|----------|---------------------------------------------------------|-------------------|--------------------------|
| 235      | 5.1 Å PO-to-2'-OH distance<br>3.4 Å distance to O4      | <sup>a</sup>      |                          |
| 244      | 5.1 Å PO-to-2'-OH distance                              | <sup>a</sup>      |                          |
| 251      | 3.3 Å distance to OP2(268)                              | ✓                 | ✓                        |
| 352      | 2.8 Å distance to O1P                                   | ✓                 |                          |
| 561      | 2.5 Å distance to O1P                                   | ✓                 |                          |
| 758      | 3.0 Å distance to N6(583)                               | ✓                 | ✓                        |
| 789      | 2.6 Å distance to N7(791)                               | ✓                 | ✓                        |
| 812      | 2.8 Å distance to N1(765)                               | ✓                 | ✓                        |
| 867      | 2.6 Å distance to N1(873)                               | ✓                 | ✓                        |
| 871      | 5.3 Å PO-to-2'-OH distance                              |                   |                          |
| 911      | 3.4 Å distance to O4(912)<br>5.3 Å PO-to-2'-OH distance | ✓                 | ✓                        |
| 912      | 5.2 Å PO-to-2'-OH distance                              | ✓                 |                          |
| 1201     | 2.0 Å distance to O1P(1200)<br>2.5 Å distance to OP     | ✓                 | ✓                        |
| 1396     | 2.7 Å distance to O1P(15)                               | ✓                 | ✓                        |
| 1403     | 3.2 Å distance to N1(1499)                              | ✓                 | ✓                        |
| 1404     | 2.8 Å distance to O2'(1519)                             | ✓                 | ✓                        |
| 1467     | 5.1 Å PO-to-2'-OH distance                              | <sup>a</sup>      |                          |
| 1468     | 2.6 Å distance to O2'(318)                              | ✓                 | ✓                        |

<sup>a</sup> Does not fully conform. PO vector is oriented away from the 2'-OH but is not as long as for the hyper-reactive nucleotides. Numbers in parentheses indicate interactions with non-adjacent nucleotides.
